# Supplementary material
Source: bioRxiv or medRxiv preprint supplement (http://medrxiv.stage.highwire.org/highwire/filestream/85010/field_highwire_adjunct_files/0/2020.06.08.20118513-1.pdf)
Supplement: Supplementary file [file 2020.06.08.20118513-1.pdf]

## Healthy and extreme breathing inflow conditions

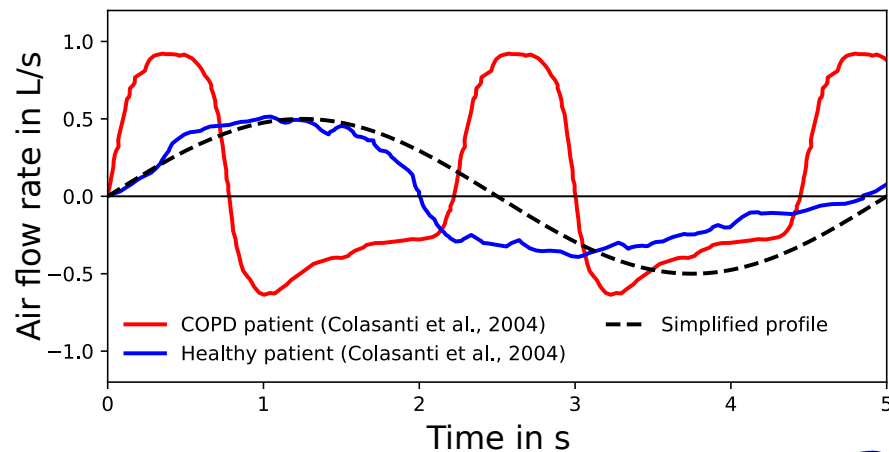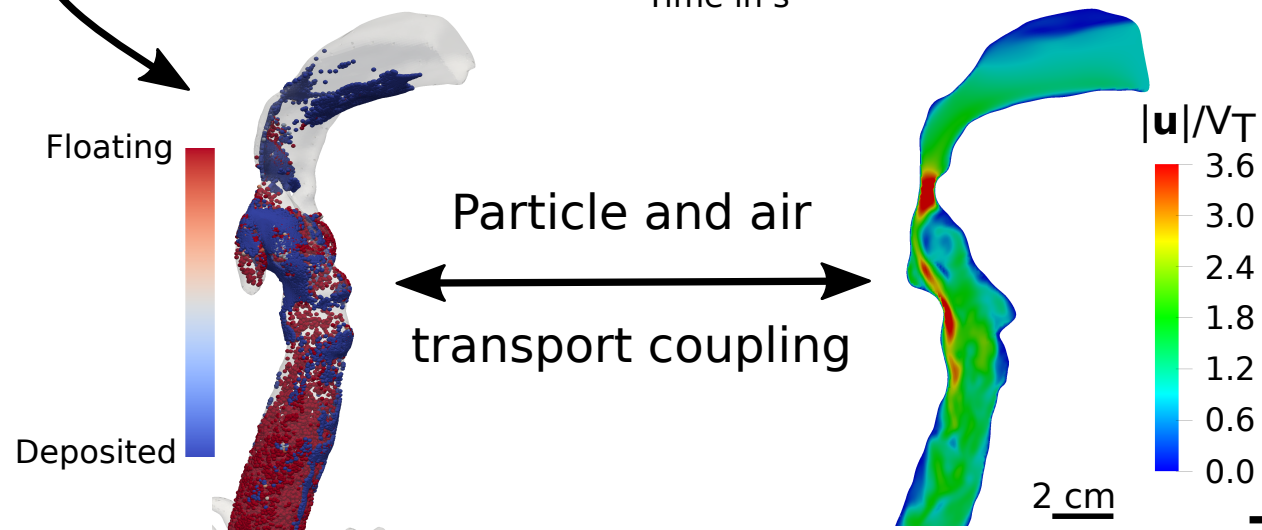

## Patient-specific drug deposition analysis

Healthy patient  
(healthy inhalation)

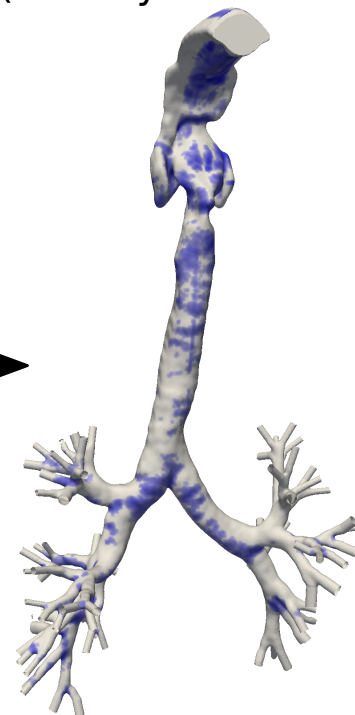

Healthy patient  
(diseased inhalation)

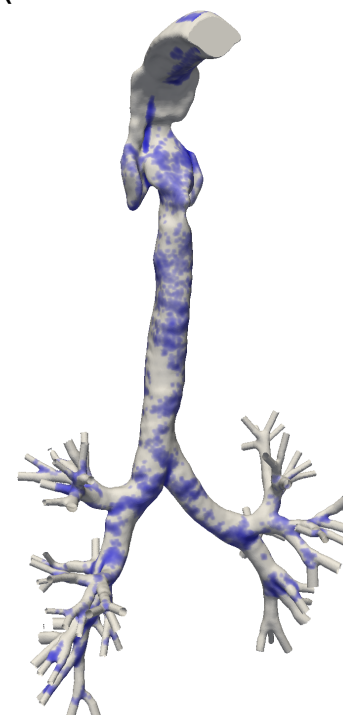

Cystic fibrosis  
child patient

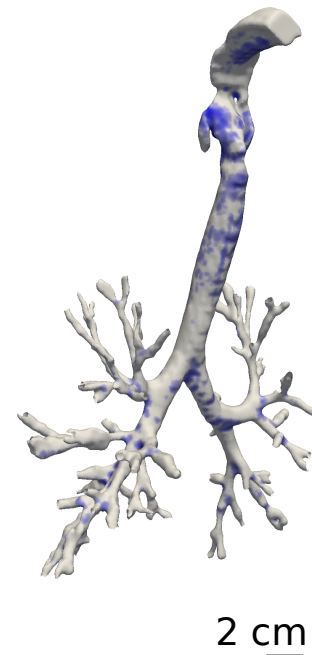

Deposition concentration (relative to mean)

350 100 10 1 0.1 0.01
